# Supplementary material for: Concussion and long-term cognitive impairment among professional or elite sport-persons: a systematic review
Source: PubMed Central journal article supplement — J Neurol Neurosurg Psychiatry. 2020 Feb 27;91(5):455–68. doi: 10.1136/jnnp-2019-321170 (PMC7231435; doi:10.1136/jnnp-2019-321170), 2020-02-27
Supplement: jnnp-2019-321170supp002.pdf [file jnnp-2019-321170supp002.pdf]

Supplementary Table 2: Results of the Newcastle-Ottawa Score stars assigned to each paper, by domain

|                            | <b>Representativeness<br/>*</b>    | <b>Sample size<br/>*</b> | <b>Non-respondents<br/>*</b>      | <b>Exposure assessment<br/>**</b>         | <b>Comparability<br/>**</b>                       | <b>Outcome assessment<br/>**</b>                                         | <b>Statistical test<br/>*</b>                           | <b>Total (Out of 10)</b> |
|----------------------------|------------------------------------|--------------------------|-----------------------------------|-------------------------------------------|---------------------------------------------------|--------------------------------------------------------------------------|---------------------------------------------------------|--------------------------|
| McMillan et al, 2017 (32)  | Sampling frame identified (*)      | Not justified            | No description of non-respondents | Description of concussion (*)             | No adjustment for confounding with rugby cohort   | Self-reported (*)                                                        | Examined number of concussions within rugby players (*) | 4                        |
| Hume et al, 2017 (31)      | Self-selected cohort               | Not justified            | No description of non-responders  | Definition of concussion (*)              | No adjustment for confounding within rugby cohort | Self reported (*)                                                        | No test of concussion in elite cohort                   | 2                        |
| Decq et al, 2016 (27)      | Sampling frame identified (*)      | Not justified            | No description of non-responders  | No description of concussion data         | No attempt to examine effect of concussion        | Self-reported using scale (*)                                            | Examined number of concussions within rugby players (*) | 3                        |
| Esopenko et al, 2018* (28) | No clear sampling frame identified | Not justified            | No description of non-respondents | Description of concussion (*)             | Adjusted for age in analysis of alumni group (*)  | Self-reported (*)                                                        | Examined concussion within ice-hockey players (*)       | 4                        |
| Baker et al, 2018 (24)     | No clear sampling frame identified | Not justified            | No description of non-respondents | No mention of concussion data             | No attempt to examine effect of concussion        | Self-reported (*)                                                        | No test of concussion in ice hockey players             | 1                        |
| Misquitta et al, 2018 (33) | No clear sampling frame identified | Not justified            | No description of non-respondents | Zurich guidelines on concussions used (*) | Regression model adjusted for age (*)             | Imaging data – not clear if done in absence of knowledge of exposure (*) | Appropriate regression analysis (*)                     | 4                        |

|                           | <b>Representativeness</b><br>*      | <b>Sample size</b><br>* | <b>Non-respondents</b><br>*      | <b>Exposure assessment</b><br>**                  | <b>Comparability</b><br>**                                           | <b>Outcome assessment</b><br>**                      | <b>Statistical test</b><br>*                                    | <b>Total (Out of 10)</b> |
|---------------------------|-------------------------------------|-------------------------|----------------------------------|---------------------------------------------------|----------------------------------------------------------------------|------------------------------------------------------|-----------------------------------------------------------------|--------------------------|
|                           |                                     |                         |                                  | (Career used as a proxy for repeated concussions) |                                                                      |                                                      |                                                                 |                          |
| Alosco et al 2017 (22)    | No description of sampling strategy | Not justified           | No description of non-responders | Cumulative head impact index (**)                 | Mixed effect models adjusted for age and BMI (**)                    | Neuropsychological test battery and self-reports (*) | Appropriate statistical modelling (*)                           | 6                        |
| Multani et al, 2016 (34)  | No description of sampling strategy | Not justified           | No description of non-responders | Description of concussion (*)                     | No reported analyses within football players                         | Neuro-psychological testing (*)                      | Test not appropriately applied to examine concussion            | 2                        |
| Hart et al, 2013 (30)     | Probably not representative         | Not justified           | No description of non-responders | Concussion using 1997 AAN guidelines (**)         | Main analysis within NFL players (*)                                 | Neuro-psychological testing (*)                      | No test of concussion within players                            | 4                        |
| Randolph et al, 2013 (35) | Selected as having MCI              | Not justified           | No description of non-responders | No mention of concussion data                     | Analysis of NFL players by cumulative years of professional play (*) | Modified telephone interview of cognitive status (*) | Cumulative years of play (surrogate for cumulative concussions) | 3                        |
| Amen et al, 2011 (23)     | Probably not representative         | Not justified           | No description of non-responders | Self-reported concussion (*)                      | Not obvious that controlled analysis performed                       | Neuro-psychological tests (*)                        | Analysis of concussion within cohort (*)                        | 3                        |

|                             | <b>Representativeness<br/>*</b>                                   | <b>Sample size<br/>*</b>                 | <b>Non-respondents<br/>*</b>                     | <b>Exposure assessment<br/>**</b>                           | <b>Comparability<br/>**</b>    | <b>Outcome assessment<br/>**</b> | <b>Statistical test<br/>*</b>          | <b>Total (Out of 10)</b> |
|-----------------------------|-------------------------------------------------------------------|------------------------------------------|--------------------------------------------------|-------------------------------------------------------------|--------------------------------|----------------------------------|----------------------------------------|--------------------------|
| Guskiewicz et al, 2005 (29) | Questionnaire sent to all retired players (69% response rate) (*) | Not justified                            | No description of non-responders                 | Self-reported concussion (*)                                | Analysis stratified by age (*) | MCI questionnaire (*)            | Chi-squared test for trend (*)         | 5                        |
| Bang et al, 2016 (25)       | Small case series                                                 | Not justified                            | No description of non-responders                 | No concussion data collected                                | Not sufficient sample size     | Purdue pegboard test (*)         | To small a sample to be meaningful     | 1                        |
| Bernick et al, 2015 (26)    | Not clear how representative                                      | Comparison of sample with population (*) | No specific mention of results of the comparison | Knockouts and technical knockouts (forms of concussion) (*) | Multivariable modelling (*)    | Computerised battery of test (*) | Appropriate analysis including Cis (*) | 6                        |

\* One "control" excluded due to a history of concussion with extended post-concussion symptoms. Another was diagnosed with Parkinson's shortly after testing and so was excluded.
