# Supplementary material for: Concussion and long-term cognitive impairment among professional or elite sport-persons: a systematic review
Source: PubMed Central journal article supplement — J Neurol Neurosurg Psychiatry. 2020 Feb 27;91(5):455–68. doi: 10.1136/jnnp-2019-321170 (PMC7231435; doi:10.1136/jnnp-2019-321170), 2020-02-27
Supplement: jnnp-2019-321170supp003.pdf [file jnnp-2019-321170supp003.pdf]

Supplementary Table 3: Characteristics of included studies

| Ref.                         | Study design                                                                                                                         | Sport and duration of career                                                                                                           | Sportspeople population and recruitment                                                                                                                                                                                                                                                                                                               | Comparison group                                                                                                                                                                                                                                                                                                                                                       | Variables adjusted for in the analysis                                                                                                                                                                                                                                                  | Funding                                                                                        | NOS score |
|------------------------------|--------------------------------------------------------------------------------------------------------------------------------------|----------------------------------------------------------------------------------------------------------------------------------------|-------------------------------------------------------------------------------------------------------------------------------------------------------------------------------------------------------------------------------------------------------------------------------------------------------------------------------------------------------|------------------------------------------------------------------------------------------------------------------------------------------------------------------------------------------------------------------------------------------------------------------------------------------------------------------------------------------------------------------------|-----------------------------------------------------------------------------------------------------------------------------------------------------------------------------------------------------------------------------------------------------------------------------------------|------------------------------------------------------------------------------------------------|-----------|
| <b>Rugby</b>                 |                                                                                                                                      |                                                                                                                                        |                                                                                                                                                                                                                                                                                                                                                       |                                                                                                                                                                                                                                                                                                                                                                        |                                                                                                                                                                                                                                                                                         |                                                                                                |           |
| McMillan TM et al, 2017 (32) | Cross-sectional with external comparison group ("population" controls)                                                               | Retired international rugby players (Scottish Rugby Union)<br><br>Average number of international matches played: 24 (SD 24; IQR 5-40) | – 52 retired rugby international players<br>– Mean age (SD): 53.5 (13.0)<br>– Recruited through Scottish Rugby Union<br>– Response rate: 52/~350 former players, 71 of whom volunteered and were eligible (15%)                                                                                                                                       | – 46 population controls<br>– Mean age (SD): 55.1 (9.0)<br>– Recruited as friends and family members of the rugby players, members of community groups, or teachers                                                                                                                                                                                                    | Age, Scottish Index of Multiple Deprivation, education                                                                                                                                                                                                                                  | Sackler Foundation, Chief Scientist Office, NHS Research Scotland Career Researcher Fellowship | 4         |
| Hume et al, 2017 (31)        | Cross-sectional with between sports (community rugby players and non-contract sportspeople) and external comparison group (US norms) | Elite New Zealand rugby players<br><br>Mean career duration in years 23.0 (SD 8.1)                                                     | – 103 former elite rugby players (national or international)<br>– Age range: 29-72, mean age 41.3 (SD 7.5)<br>– Self-selected cohort from the larger Rugby Health project (N=485)<br>– Response rate (including elite rugby N=103, community rugby N=198, non-contact sport retiree N=65): 75% but impossible inferring on the original response rate | <b>BETWEEN SPORTS COMPARISON</b><br>– 198 community rugby players<br>– Age range: 29-72, mean age 44.9 (SD 8.4)<br><br>– 65 non-contact-sport retirees (cricket and field hockey players)<br>– Age range: 29-72, mean age 42.1 (SD 7.7)<br><br>– Both groups self-selected cohort from the larger Rugby Health project<br><br><b>EXTERNAL COMPARISON</b><br>– US norms | None ("No significant correlations were observed between former players' demographic characteristics (e.g. age, education level, ethnicity, alcohol use) or sport played/level with the neuropsychological variables, therefore these factors were not used as covariates in analyses") | Not disclosed                                                                                  | 2         |
| Decq et al. 2016 (27)        | Cross-sectional with a between sports comparison group (high level retired sportspeople)                                             | Retired rugby players who have reached the first division championship level in France between 1985 and 1990<br><br>Minimum 10 years   | – 239 retired rugby players<br>– Age range: 49-55 years<br>– Identified from French first division championship game sheets<br>– 1,491 players identified, 1,047 contacted, 524 invited to participate, and 239 included. Response rate: 46% or 23% depending on selection criteria used                                                              | – 138 control from high levels sports with 'low risk' of recurrent concussion<br>– Age range: 49-55 years<br>– Identified through sporting federations<br>– Out of 637 sportsmen, 455 were invited to participate and 138 were included. Response rate 30%, or 22% depending on selection criteria used                                                                | Not clear which variables collected were adjusted for in the analysis (smoking and education?)                                                                                                                                                                                          | Fédération Française de Rugby and the Ligue Nationale de Rugby                                 | 3         |
| <b>Ice Hockey</b>            |                                                                                                                                      |                                                                                                                                        |                                                                                                                                                                                                                                                                                                                                                       |                                                                                                                                                                                                                                                                                                                                                                        |                                                                                                                                                                                                                                                                                         |                                                                                                |           |
| Esopenko C et al, 2018 (28)  | Cross-sectional study with external comparison group ("community" controls)                                                          | National Hockey League and other professional and minor professional leagues<br><br>No information given on length of career           | – 33 former professional hockey players<br>– Mean age (SD): 54.3 (10.4)<br>– Recruited through NHL Alumni Association by email, media presentations, participation in local hockey tournaments and word of mouth<br>– Response rate not given                                                                                                         | – 18 age-matched comparison group of healthy males recruited from the community with no history of concussion<br>– Mean age (SD): 53.5 (10.2)<br>– Recruited from the "community"<br>– Response rate not given                                                                                                                                                         | N/A (Principle component analysis used)                                                                                                                                                                                                                                                 | Canadian Institute of Health Research Catalyst, Ontario Neurotrauma Foundation                 | 4         |

| American Football (US and Canadian) |                                                                                                                                                     |                                                                                                                                        |                                                                                                                                                                                                                                                                                                                                                                                                                                                                               |                                                                                                                                                                                                                                                                                                                                                                                                                                |                                                   |                                                                                                                                 |   |
|-------------------------------------|-----------------------------------------------------------------------------------------------------------------------------------------------------|----------------------------------------------------------------------------------------------------------------------------------------|-------------------------------------------------------------------------------------------------------------------------------------------------------------------------------------------------------------------------------------------------------------------------------------------------------------------------------------------------------------------------------------------------------------------------------------------------------------------------------|--------------------------------------------------------------------------------------------------------------------------------------------------------------------------------------------------------------------------------------------------------------------------------------------------------------------------------------------------------------------------------------------------------------------------------|---------------------------------------------------|---------------------------------------------------------------------------------------------------------------------------------|---|
| Baker JG, et al 2018 (24)           | Cross-sectional study with between sports comparison group (non-contact master athletes)                                                            | National Football League (NFL) and National Hockey League (NHL) players<br><br>Minimum 2 season play (85)                              | <ul style="list-style-type: none"> <li>– 21 retired players</li> <li>– Age: 36 to 72 years</li> <li>– Mean age: 56.7 years</li> <li>– Recruitment through the alumni association with not clear procedures but based on volunteering (the authors reported that alumni too sick to participate and those with a public role were underrepresented) (85)</li> </ul>                                                                                                            | <ul style="list-style-type: none"> <li>– 21 non-contact sport master athletes</li> <li>– Age: 36- 72 years</li> <li>– Mean age: 55.4 years</li> <li>– No history of concussion</li> <li>– Recruitment and response rate not clear</li> </ul>                                                                                                                                                                                   | Age education and ethnicity normative scores used | Not stated                                                                                                                      | 1 |
| Misquitta K et al, 2018 (33)        | Cross-sectional study with two external comparison groups (“population” controls and controls from the Cambridge Centre for Aging and Neuroscience) | Former Canadian football players<br><br>Played at least a season with Canadian Football League<br>Median (IQR) years in CFL: 9 (5-11)  | <ul style="list-style-type: none"> <li>– 53 former Canadian football players</li> <li>– Mean age: 55 ± 13 years</li> <li>– Recruitment unclear</li> <li>– Response rate not reported</li> </ul>                                                                                                                                                                                                                                                                               | <p>FIRST COMPARISON GROUP</p> <ul style="list-style-type: none"> <li>– 25 age- and education-matched controls</li> <li>– Mean age: 51 ± 10 years</li> <li>– Recruited from the general population</li> </ul> <p>SECOND COMPARISON GROUP</p> <ul style="list-style-type: none"> <li>– 321 age-matched male controls from the Cambridge Centre for Aging and Neuroscience (CAMCAN)</li> <li>– Mean age: 58 ± 16 years</li> </ul> | None                                              | Physicians' Services Incorporated Foundation and the Toronto General and Western Hospital Foundation                            | 4 |
| Alosco et al, 2017 (22)             | Cross-sectional study with external comparison group                                                                                                | NFL players<br><br>Minimum 2 years of active playing time in the NFL<br><br>12 or more total years of participation in tackle football | <ul style="list-style-type: none"> <li>– 124 retired NFL players</li> <li>– Age range: 40-69 years</li> <li>– Median years in CFL (IQR): 9 (5-11)</li> <li>– With self-reported complains of cognitive, behavioural and mood symptoms for at least 6 months</li> <li>– Sample of participants recruited in DETECT through e-mails, NFL Alumni Association, Boston University Alzheimer's Disease and CTE Center social media</li> <li>– Response rate not reported</li> </ul> | <ul style="list-style-type: none"> <li>– 28 age-matched controls</li> <li>– Aged 40-69</li> <li>– No history of participating in contact sport nor of concussion</li> <li>– Recruited through social media and word of mouth</li> </ul>                                                                                                                                                                                        | Age and education                                 | National Institute of Health (NIH)                                                                                              | 6 |
| Multani et al. 2016 (34)            | Cross-sectional with external comparison group                                                                                                      | Canadian Football players with history of multiple concussions<br><br>Duration of career 7.8±4 years                                   | <ul style="list-style-type: none"> <li>– 18 retired Canadian Football players selected on the basis of history of multiple concussion</li> <li>– Mean age: 49.6±12 years</li> <li>– Playing history: 7.8±4 years</li> <li>– Recruitment unknown</li> </ul>                                                                                                                                                                                                                    | <ul style="list-style-type: none"> <li>– 17 age- and education- matched controls, no reported concussion history</li> <li>– Mean age: 46.7±10 years</li> <li>– Recruitment not stated</li> </ul>                                                                                                                                                                                                                               | None                                              | PSI Foundation and the Canadian Sports Concussion Project, Krembil Neuroscience Centre, Toronto Western Hospital                | 2 |
| Hart et al. 2013 (30)               | Cross-sectional with external comparison group                                                                                                      | American Football players<br><br>2-15 years                                                                                            | <ul style="list-style-type: none"> <li>– 34 retired NFL players</li> <li>– Age range: 41-79 years</li> <li>– Mean age 61.8 years (95% CI, 57.8-65.7)</li> <li>– Recruited from meeting of the NFL Players Association local chapter (North Texas), word of mouth and advertising. Sample made of volunteers who asked to participate</li> </ul>                                                                                                                               | <ul style="list-style-type: none"> <li>– 26 healthy controls with no history of concussion</li> <li>– Age range: 41-79</li> <li>– Mean age: 60.1 (95% C.I. 54.6-64.1)</li> <li>– Recruited from normal aging studies at the Centre for Brain Health at the University of Texas at Dallas</li> <li>– 26 out of the original (31%) 85 screened included</li> </ul>                                                               |                                                   | Brain-Health Institute for Athletes at the Center for Brain-Health (University of Texas Dallas) and National Institute on Aging | 4 |

|                                |                                                                                                               |                                                                                                                                                        |                                                                                                                                                                                                                                                                                                                                                    |                                                                                                                                                                                                                                                                                                                                                            |                                                                        |                                                                                                                     |   |
|--------------------------------|---------------------------------------------------------------------------------------------------------------|--------------------------------------------------------------------------------------------------------------------------------------------------------|----------------------------------------------------------------------------------------------------------------------------------------------------------------------------------------------------------------------------------------------------------------------------------------------------------------------------------------------------|------------------------------------------------------------------------------------------------------------------------------------------------------------------------------------------------------------------------------------------------------------------------------------------------------------------------------------------------------------|------------------------------------------------------------------------|---------------------------------------------------------------------------------------------------------------------|---|
| Randolph et al., 2013 (35)     | Cross-sectional with two external comparison groups (one of patients diagnosed with MCI) and population norms | American Football NFL players<br><br>Length of career not stated<br><br>Among those cognitively impaired, mean (SD) career: 7.5 (3.4) years            | <ul style="list-style-type: none"> <li>– 513 retired NFL players</li> <li>– Mean age 64.2 years (SD 5.5)</li> <li>– Initial sample of NFL players affiliated with the NFL Player's Association invited (N=3729) with 68% response rate</li> <li>– New data collection on 908 of them aged 50+ (response rate 57%)</li> </ul>                       | <ul style="list-style-type: none"> <li>– 81 patients diagnosed with MCI by a neuropsychologist according to the core clinical criteria of the revised NIA-AA guidelines (88)</li> <li>– 41 cognitively normal subjects was extracted from the RBANS standardization database to match the NFL sample on the basis of age, education, and gender</li> </ul> | None (the healthy control sample was matched on demographic variables) | Martek Biosciences Corporation                                                                                      | 3 |
| Amen et al. 2011 (23)          | Cross-sectional with external comparison group                                                                | American Football<br><br>In active NFL roster for a minimum of 3 years                                                                                 | <ul style="list-style-type: none"> <li>– 100 Active and retired NFL players</li> <li>– Age range: 25-82 years</li> <li>– Mean age: 52.3 (SD 12.4)</li> <li>– Recruited from retired NFL Players Association meetings and word of mouth.</li> </ul>                                                                                                 | <ul style="list-style-type: none"> <li>– 20 healthy controls, no documented concussion history for SPECT</li> <li>– Standardized sample (N=810), chosen to be representative to the U.S. population of adults between the ages of 18 and 89 with regard to education, gender, and ethnicity for the MicroCog test</li> </ul>                               | None                                                                   | Not disclosed                                                                                                       | 3 |
| Guskiewicz et al. 2005 (29)    | Cross-sectional with external comparison group                                                                | American football players<br><br>Mean duration of overall career of 15.1 years (SD 4.3)<br><br>Mean duration of professional career 6.6 years (SD 3.6) | <ul style="list-style-type: none"> <li>– 758 retired footballers aged 50+ years</li> <li>– Mean age: 53.8 years (SD 13.4)</li> <li>– Members of National Football League Retired Player's Association, US</li> <li>– Minimum 2 seasons as professional footballers</li> <li>– Recruitment procedures not clear, response rate not given</li> </ul> | <ul style="list-style-type: none"> <li>– External comparison: age-adjusted prevalence ratios using estimates from the general population</li> <li>– Internal comparison: concussed vs. not concussed</li> </ul>                                                                                                                                            | Not clear which variables collected were adjusted for in the analysis  | Not disclosed                                                                                                       | 5 |
| <b>Boxing and Martial Arts</b> |                                                                                                               |                                                                                                                                                        |                                                                                                                                                                                                                                                                                                                                                    |                                                                                                                                                                                                                                                                                                                                                            |                                                                        |                                                                                                                     |   |
| Bang et al. 2016 (25)          | Case-series with external comparison group                                                                    | Boxing<br><br>At least 10 years                                                                                                                        | <ul style="list-style-type: none"> <li>– 5 professional retired boxers</li> <li>– Age range: 42-49 years</li> <li>– Career duration of 8-19 years</li> <li>– Recruitment criteria not stated</li> </ul>                                                                                                                                            | <ul style="list-style-type: none"> <li>– 4 age matched controls with no history of concussion</li> <li>– Age range: 46-53 years</li> <li>– Recruitment criteria not stated</li> </ul>                                                                                                                                                                      | None                                                                   | Ministry of Health & Welfare, Republic of Korea and Ministry of Science, ICT and Future Planning, Republic of Korea | 1 |
| Bernick et al. 2015 (26)       | Cross-sectional study (baseline of a cohort study). with external comparison group                            | Fighters (both martial arts fighters and boxers)<br><br>Licensed to fight professionally in one of the combat sports                                   | <ul style="list-style-type: none"> <li>– 224 fighters (93 boxers, 131 MMA)</li> <li>– Age range: 18-44 years</li> <li>– Career duration: 0 – 24 years (mean: 4 years)</li> <li>– Professional fights range: 0-101 (mean:10)</li> <li>– Recruited from the Professional Fighters Brain Health Study</li> </ul>                                      | <ul style="list-style-type: none"> <li>– 22 age and education matched controls</li> <li>– No history concussion, or participation in high risk sport</li> </ul>                                                                                                                                                                                            | Results adjusted for intracranial volume, age, race and education      | Not disclosed                                                                                                       | 6 |
