# Supplementary material for: Concussion and long-term cognitive impairment among professional or elite sport-persons: a systematic review
Source: PubMed Central journal article supplement — J Neurol Neurosurg Psychiatry. 2020 Feb 27;91(5):455–68. doi: 10.1136/jnnp-2019-321170 (PMC7231435; doi:10.1136/jnnp-2019-321170), 2020-02-27
Supplement: jnnp-2019-321170supp004.pdf [file jnnp-2019-321170supp004.pdf]

Supplementary Table 4: Detailed data on neurocognitive assessment extracted from the included papers

| Reference                 | Type of neurocognitive test                 | Domain                     | Results                                                                                                                                                                                                                                                                                                                                                                                                                        |
|---------------------------|---------------------------------------------|----------------------------|--------------------------------------------------------------------------------------------------------------------------------------------------------------------------------------------------------------------------------------------------------------------------------------------------------------------------------------------------------------------------------------------------------------------------------|
| McMillan et al. 2018 (32) | Montreal Cognitive Assessment (MOCA)        | General cognitive function | Mean 27.4 for retired international rugby players (RIRP) vs 28.0 for comparison group (p=0.806)                                                                                                                                                                                                                                                                                                                                |
|                           | Symbol Digit Test                           | Processing speed           | - 50.9 mean for Scottish International rugby players (RIRP) vs 53.0 for comparison group (p=0.490)                                                                                                                                                                                                                                                                                                                             |
|                           | Trail Making Test B                         | Executive Function         | - 56.1 mean for RIRP vs 51.9 for comparison group (p=0.434)                                                                                                                                                                                                                                                                                                                                                                    |
|                           | Rey Auditory Verbal Learning Test (RAVLT)   | Memory & Learning          | - Immediate recall 50.2 for RIRP vs 56.1 for comparison group (p=0.022)<br>- Delayed recall 10.5 for RIRP vs 11.6 for comparison group (p=0.165)                                                                                                                                                                                                                                                                               |
|                           | Sustained Attention to Response Task (SART) | Sustained Attention        | - Sustained attention in response task (SART) commission errors 10.3 for RIRP vs 10.0 for comparison group (p=0.860)<br>- SART reaction time 336 for RIRP vs 313 for comparison group (p=0.618)                                                                                                                                                                                                                                |
|                           | Judgement Line Orientation Task             | Visual perception          | - Mean of 28.2 for RIRP vs 28.1 for comparison group (p=0.442)                                                                                                                                                                                                                                                                                                                                                                 |
|                           | Lafayette Grooved Pegboard                  | Fine hand coordination     | - Dominant hand 74.9 mean for RIRP vs 68.7 for comparison group (p=0.038)<br>- Non-dominant hand 85.4 mean for RIRP vs 80.1 for comparison group (p=0.126)                                                                                                                                                                                                                                                                     |
| Hume et al., 2017 (31)    | CNS-Vital Signs (VS) Test battery           | Composite memory           | - The community-rugby group performed worse than the US norms on composite memory (-0.31, -0.48 to -0.14)                                                                                                                                                                                                                                                                                                                      |
|                           |                                             | Psychomotor speed          | - No significant difference between the groups                                                                                                                                                                                                                                                                                                                                                                                 |
|                           |                                             | Reaction time              | - All three former-player groups performed worse than the US norms on reaction time (elite rugby: -0.50, -0.69 to -0.30; community rugby: -0.61, -0.78 to -0.45; non-contact sport: -0.73, -0.98 to -0.48)                                                                                                                                                                                                                     |
|                           |                                             | Complex attention          | - Elite-rugby group performed worse on tests of complex attention (effect size -0.67, 95 % confidence interval [CI] -1.07 to -0.26) than the non-contact-sport group and the community-rugby group (-0.38, -0.71 to -0.05)<br>- Community-rugby group and the non-contact- sport group performed slightly better than the US norms on complex attention (community rugby: 0.22, 0.08–0.35; non-contact sport: 0.40, 0.20–0.60) |
|                           |                                             | Cognitive flexibility      | - The elite-rugby group performed worse on tests of cognitive flexibility (-0.37, -0.74 to 0.00) than the non-contact-sport group<br>- The community-rugby group performed worse than the non-contact group on cognitive flexibility (-0.39, -0.69 to -0.08)<br>- Rugby groups performed worse on cognitive flexibility (elite rugby: -0.26, -0.47 to -0.05; community rugby: -0.27, -0.41 to -0.13) than the US norms         |

|                           |                                                                                                                                                                                                                                                                                                                                                 |                                                                                                                |                                                                                                                                                                                                                                                                                                                                                                                                                                                                                                                                                                                                                                                                              |
|---------------------------|-------------------------------------------------------------------------------------------------------------------------------------------------------------------------------------------------------------------------------------------------------------------------------------------------------------------------------------------------|----------------------------------------------------------------------------------------------------------------|------------------------------------------------------------------------------------------------------------------------------------------------------------------------------------------------------------------------------------------------------------------------------------------------------------------------------------------------------------------------------------------------------------------------------------------------------------------------------------------------------------------------------------------------------------------------------------------------------------------------------------------------------------------------------|
|                           |                                                                                                                                                                                                                                                                                                                                                 | Processing speed                                                                                               | - Rugby groups performed worse on processing speed (elite rugby: -0.51, -0.75 to -0.26; community rugby: -0.32, -0.48 to -0.17), than the non-contact-sport group                                                                                                                                                                                                                                                                                                                                                                                                                                                                                                            |
|                           |                                                                                                                                                                                                                                                                                                                                                 | Executive functioning                                                                                          | - The elite-rugby group performed worse on tests of executive functioning (-0.41, -0.80 to -0.02) than the non-contact-sport group<br>- The community-rugby group performed worse than the non-contact group on executive functioning (-0.51, -0.89 to -0.12)<br>- Rugby groups performed worse on executive functioning (elite rugby: -0.24, -0.45 to -0.03; community rugby: -0.23, -0.37 to -0.10) than the US norms                                                                                                                                                                                                                                                      |
|                           |                                                                                                                                                                                                                                                                                                                                                 | Verbal memory                                                                                                  | - All three former-player groups performed worse than the US norms on verbal memory (elite rugby: -0.36, -0.60 to -0.12; community rugby: -0.54, -0.72 to -0.36; non-contact sport: -0.39, -0.69 to -0.08)                                                                                                                                                                                                                                                                                                                                                                                                                                                                   |
|                           |                                                                                                                                                                                                                                                                                                                                                 | Visual memory                                                                                                  | - No significant difference between the groups                                                                                                                                                                                                                                                                                                                                                                                                                                                                                                                                                                                                                               |
|                           |                                                                                                                                                                                                                                                                                                                                                 | Simple attention                                                                                               | - No significant difference between the groups                                                                                                                                                                                                                                                                                                                                                                                                                                                                                                                                                                                                                               |
|                           |                                                                                                                                                                                                                                                                                                                                                 | Motor speed                                                                                                    | - The elite-rugby group performed slightly better than the US norms in relation to motor speed (0.38, 0.19–0.57)                                                                                                                                                                                                                                                                                                                                                                                                                                                                                                                                                             |
| Decq et al., 2016 (27)    | F-TICS-m MCI score                                                                                                                                                                                                                                                                                                                              | Mild cognitive disorders (TICS-m score $\leq 30$ was considered to be compatible with mild cognitive disorder) | - Median (IQR) TICS-m score in former rugby player 30 (28-32), in other sports 31 (29-34) ( $p=0.07$ )<br>- Mean (SD) TICS-m score in former rugby player, 30.2 (3.5) in other sports 31.3 (3.6)<br>- Mild cognitive disorder (TICS-m $\leq 30$ ) 57% of former rugby player and 40% of other sports ( $p=.005$ )<br>- TICS-m score did not vary across the number of reported concussions<br>- In multivariate analysis, number of concussions were not associated with TICS-m score (only education, smoking, and perceived health were positively associated with good cognitive function, playing rugby and age were negatively associated with good cognitive function) |
| Esopenko et al. 2017 (28) | Rey-Osterrieth Complex Figure Test (RCFT); Wechsler Abbreviated Scale of Intelligence (WASI); Brief Visual Memory Test Revised (BVM-T-R); Wechsler Abbreviated Scale of Intelligence (WASI) Matrix reasoning; Symbol Digit Modalities Test (SDMT); Judgement of Line Orientation (JLO); Rey Auditory Verbal Learning Test (RAVLT); Brief Visual | Intellectual functioning, speeded attention, memory, visuospatial processing and executive functioning         | - Lower performance on the executive/intellectual function, $t(49)=5.53$ , $p<0.001$ , in alumni athletes vs comparison group<br>- Group effect was evident on the WCST, $t(43.41)=6.08$ , $p<0.001$ ; and WASI vocabulary, $t(49)=4.43$ , $p<0.001$ and similarities, $t(49)=2.17$ , $p=0.035$ , but not matrix reasoning $t(49)=1.95$ , $p=0.057$ .<br>- No significant differences for the other factors (visuospatial, $t(49)=1.18$ , $p=0.25$ ; verbal memory, $t(49)=1.16$ , $p=0.25$ ; speeded attention, $t(49)=0.16$ , $p=0.87$ ).<br>- No significant effects or interactions involving Group detected on the computerised cognitive test battery.                 |

|                            |                                                                                                                                                                                                                                                                                                                                                            |                                        |                                                                                                                                                                                                                                                                                |
|----------------------------|------------------------------------------------------------------------------------------------------------------------------------------------------------------------------------------------------------------------------------------------------------------------------------------------------------------------------------------------------------|----------------------------------------|--------------------------------------------------------------------------------------------------------------------------------------------------------------------------------------------------------------------------------------------------------------------------------|
|                            | Memory Test-Revised (BVM-T-R); Self-Ordered Pointing Task (SOPT); Paced Auditory Serial Addition Task (PASAT); Phonemic Word List Generation (FAS); Paced Auditory Serial Addition Task (PASAT); Trail Making Test (TMT) (Version B and A); Wisconsin Card Sorting Task; and computerized cognitive tests including Switching Stroop/Colour Word Remapping |                                        |                                                                                                                                                                                                                                                                                |
| Baker et al. 2018 (24)     | Wisconsin Card Sorting Test (WCST) & Delis-Kaplan Executive Function System (D-KEFS)                                                                                                                                                                                                                                                                       | Executive function                     | - D-KEFS Colour-Word Interference Inhibition: 57.67 mean score for contact sport athletes and 57.19 in non-contact sport athletes, t-test 0.23 (p=0.82)<br>- WCST Total Errors: mean of 49.43 for contact sport and 52.45 in non-contact sport athletes, t-test -1.17 (p=0.25) |
|                            | WASI-III Digit Span                                                                                                                                                                                                                                                                                                                                        | Attention                              | - 54.9 mean score for contact sport athletes and 57.33 in non-contact sport athletes, t-test -0.73 (p=0.47)                                                                                                                                                                    |
|                            | Neuropsychological Assessment Battery (NAB) (list learning and story learning test)                                                                                                                                                                                                                                                                        | Memory (immediate and delayed recall)  | - List B Immediate Recall: 50.9 in contact sport athletes and 57.24 in non-contact sport athletes, t-test -0.62 (p=0.05)<br>- List A Short Delay: 53.48 in contact sport and 57.33 in non-contact sport athletes, t-test -1.29 (p=0.2)                                         |
|                            | Controlled Oral Word Association Test (COWAT) & NAB Naming test                                                                                                                                                                                                                                                                                            | Language                               | - Letter Fluency (FAS Total score) mean of 52.95 in contact sport athletes and 47.43 in non-contact sport athletes, T-test score 1.96 (p=0.06)<br>- NAB Naming score 49.33 in contact sport athletes and 53.33 in non-contact sport athletes, T-test -2.12 (p=)                |
|                            | WASI-III Digit Symbol Subtest and Trail Making Part B                                                                                                                                                                                                                                                                                                      | Perceptual motor skills (visuospatial) | - WASI-III Digit Symbol: 55 mean score for contact sport athletes and 53.38, t-test 0.57 (p=0.57)<br>- Trail B: 48.52 mean for contact sport and 53.38 in non-contact sport athletes, t-test -0.89 (p=0.38)                                                                    |
| Misquitta et al. 2018 (33) | Rey Auditory Verbal Learning Test (RAVLT)                                                                                                                                                                                                                                                                                                                  | Verbal learning and memory             | - RAVLT short delay mean for retired Canadian Football League players (Ex-CFL) 8.8 vs 9.2 for controls (p=0.497)<br>- RAVLT long delay mean for Ex-CFL 8.1 vs 8.9 for controls (p=0.298)                                                                                       |
|                            | Rey Visual Design Learning Test (RVDLT)                                                                                                                                                                                                                                                                                                                    | Visual learning and memory             | - RVDLT long delay mean for Ex-CFL and controls was 9.2 (p=0.977)                                                                                                                                                                                                              |

|                           |                                                                                                                                                                                                                                                                                                                                                                                                                                                                                                                    |                                                                                                                                  |                                                                                                                                                                                                                                                                                                                                                                                                                                                                                                                                                                                                                                                                                                                                                                                                                                                                                                                                                                                                                                                                                                                                                                                                                                                                                                                                                                                                                                                                                                                                                                                                                                                                                                                                                                                                                                                                                                                                                              |
|---------------------------|--------------------------------------------------------------------------------------------------------------------------------------------------------------------------------------------------------------------------------------------------------------------------------------------------------------------------------------------------------------------------------------------------------------------------------------------------------------------------------------------------------------------|----------------------------------------------------------------------------------------------------------------------------------|--------------------------------------------------------------------------------------------------------------------------------------------------------------------------------------------------------------------------------------------------------------------------------------------------------------------------------------------------------------------------------------------------------------------------------------------------------------------------------------------------------------------------------------------------------------------------------------------------------------------------------------------------------------------------------------------------------------------------------------------------------------------------------------------------------------------------------------------------------------------------------------------------------------------------------------------------------------------------------------------------------------------------------------------------------------------------------------------------------------------------------------------------------------------------------------------------------------------------------------------------------------------------------------------------------------------------------------------------------------------------------------------------------------------------------------------------------------------------------------------------------------------------------------------------------------------------------------------------------------------------------------------------------------------------------------------------------------------------------------------------------------------------------------------------------------------------------------------------------------------------------------------------------------------------------------------------------------|
| Alosco et al. 2017 (22)   | Trail Making Test (TMT) Parts A and B; Wechsler Adult Intelligence Scale-Revised (WAIS-R) Digit Span and Digit Symbol Tests; Wisconsin Card Sorting Test; Controlled Oral Word Association Test (COWAT); Delis-Kaplan Executive Function System Colour-Word Interference Test (DKEFS); Boston Qualitative Scoring System for the Rey-Osterrieth Complex Figure (ROCF); Neuropsychological Assessment Battery (NAB) Story Learning Test, List Learning Test, Map Reading Test, and Naming Test; and Animal Fluency. | Attention, executive function, psychomotor speed, visual and verbal episodic memory, language, motor, and visuospatial functions | <ul style="list-style-type: none"> <li>- More impaired factor scores for NFL players vs control group in the psychomotor speed/executive function, t-test 2.61 (p=0.012) but not for the verbal (p=0.209) or visual (p=0.102) memory domains.</li> <li>- NFL players performed worse across most of the cognitive measures compared to the comparison group</li> <li>- Trails A Time: T-score, 54.18 (10.37) mean score for comparison group vs 49.01 (11.72) mean for NFL group, p=0.030</li> <li>- Digit Symbol: scaled score, 11.71 (2.05) mean score for comparison group vs 10.15 (2.03) mean for NFL group, p=0.003</li> <li>- Trails B Time: T-scores, 52.75 (15.38) mean score for comparison group vs 43.77 (15.86) mean for NFL group, p=0.005</li> <li>- DKEFS Inhibition/Switching completion time: scaled score, 12.00 (2.68) mean score for comparison group vs 10.60 (2.92) mean for NFL group, p=0.078</li> <li>- COWAT: T-score, 52.21 (9.80) mean score for comparison group vs 48.96 (11.38) mean for NFL group, p=0.197</li> <li>- ROCF Immediate Copy, Presence &amp; Accuracy: T-score, 53.39 (7.69) mean score for comparison group vs 47.91 (9.93) mean for NFL group, p=0.021</li> <li>- ROCF Delayed Presence &amp; Accuracy: T-score, 55.00 (7.88) mean score for comparison group vs 48.43 (11.01) mean for NFL group, p=0.006</li> <li>- NAB Phrase Unit (1 &amp; 2) Immediate Recall: T-score, 43.00 (10.82) mean score for comparison group vs 39.19 (8.45) mean for NFL group, p=0.045</li> <li>- NAB Phrase Unit Delayed Recall: T-score, 46.79 (10.12) mean score for comparison group vs 41.75 (7.77) mean for NFL group, p=0.006</li> <li>- NAB List A Short Delay: T-score, 51.96 (11.99) mean score for comparison group vs 44.55 (13.03) mean for NFL group, p=0.014</li> <li>- NAB List A Long Delay: T-score, 49.75 (12.88) mean score for comparison group vs 41.55 (13.77) mean for NFL group, p=0.010</li> </ul> |
| Multani et al., 2016 (34) | Rey Visual Design Learning Test (RVDLT)                                                                                                                                                                                                                                                                                                                                                                                                                                                                            | Visuospatial learning and memory                                                                                                 | <ul style="list-style-type: none"> <li>- RVDLT total learning score: 41.39 ± 13.1 in retired players, and 35.59 ± 8.7 in comparison group (p=0.303)</li> <li>- RVDLT long delay total score: 10.11 ± 3.3 in retired players, and 9.76 ± 2.1 in comparison group (p=0.443)</li> </ul>                                                                                                                                                                                                                                                                                                                                                                                                                                                                                                                                                                                                                                                                                                                                                                                                                                                                                                                                                                                                                                                                                                                                                                                                                                                                                                                                                                                                                                                                                                                                                                                                                                                                         |
|                           | Wechsler Test of Adult Reading (WTAR)                                                                                                                                                                                                                                                                                                                                                                                                                                                                              | Pre-morbid intellectual functioning, verbal memory                                                                               | <ul style="list-style-type: none"> <li>- WTAR standard score: 113.87 ± 6.6 in retired players, and 11.94 ± 8.2 in comparison group (p=0.781)</li> </ul>                                                                                                                                                                                                                                                                                                                                                                                                                                                                                                                                                                                                                                                                                                                                                                                                                                                                                                                                                                                                                                                                                                                                                                                                                                                                                                                                                                                                                                                                                                                                                                                                                                                                                                                                                                                                      |
| Hart et al., 2013 (30)    | Trail Making Test Parts A and B & Digit Span Subtest from the Wechsler Adult Intelligence Scale                                                                                                                                                                                                                                                                                                                                                                                                                    | Attention and cognitive flexibility                                                                                              | <ul style="list-style-type: none"> <li>- Trail Making Test Part A score: 49.0 (45.8-52.1) for comparison group, 50.2 (44.2-56.2) for unimpaired NFL players, 52.0 (47.8-56.2) for cognitive impaired NFL players (p=0.58)*</li> <li>- Trail Making Test Part B score: 54.1 (50.6-57.5) for comparison group, 51.9 (44.9-58.9) for unimpaired NFL players, 46.8 (40.5-53.1) for cognitive impaired NFL players (p=0.12)*</li> </ul>                                                                                                                                                                                                                                                                                                                                                                                                                                                                                                                                                                                                                                                                                                                                                                                                                                                                                                                                                                                                                                                                                                                                                                                                                                                                                                                                                                                                                                                                                                                           |

|                            |                                                                                                                                  |                                                                                                                                                            |                                                                                                                                                                                                                                                                                                                                                                                                                                                                                                                                                                                           |
|----------------------------|----------------------------------------------------------------------------------------------------------------------------------|------------------------------------------------------------------------------------------------------------------------------------------------------------|-------------------------------------------------------------------------------------------------------------------------------------------------------------------------------------------------------------------------------------------------------------------------------------------------------------------------------------------------------------------------------------------------------------------------------------------------------------------------------------------------------------------------------------------------------------------------------------------|
|                            |                                                                                                                                  |                                                                                                                                                            | - WAIS-IV Digit span SS: 11.0 (10.0-12.0) for comparison group, 9.3 (7.2-11.5) for unimpaired NFL players, 10.3 (8.4-12.2) for cognitive impaired NFL players (p=0.35)*                                                                                                                                                                                                                                                                                                                                                                                                                   |
| Randolph et al., 2013 (35) | Wechsler Adult Intelligence Test-III (WAIS-3) and the Repeatable Battery for the Assessment of Neuropsychological Status (RBANS) | Verbal memory, processing speed, visuospatial ability, language, attention                                                                                 | - RBANS Total Scale score mean for the NFL sample was significantly lower than the comparison group, F= 10.4; p= 0.002.                                                                                                                                                                                                                                                                                                                                                                                                                                                                   |
| Amen et al. 2011 (23)      | MicroCog Assessment of Cognitive Functioning                                                                                     | Attention/mental control, memory, reasoning, spatial processing and reaction time                                                                          | - Players scored in the bottom half of the percentile placements on all measures except spatial processing and reaction-time, which were both in the top half of the percentile placements.                                                                                                                                                                                                                                                                                                                                                                                               |
|                            | Conners' Continuous Performance Test II (CCPT II)                                                                                | Response inhibition and attention (validated screening tool that assigns a clinical probability of having attention-deficit hyperactivity disorder (ADHD)) | - 84% of the players had a 50% greater chance of having ADHD based on CCPT II                                                                                                                                                                                                                                                                                                                                                                                                                                                                                                             |
| Bang et al. 2016 (25)      | Mini-Mental State Examination (MMSE)                                                                                             | Visuospatial skills, language, concentration, working memory, memory recall, and orientation                                                               | - Mean (SD) MMSE in former boxers 28.6 (1.5) in comparison group 30.0 (0.0) (p=0.212)                                                                                                                                                                                                                                                                                                                                                                                                                                                                                                     |
|                            | Hopkins Verbal Learning Test (HVL) : verbal memory                                                                               | Verbal episodic memory                                                                                                                                     | - Mean (SD) Immediate recall in boxers 15.2 (3.0) in comparison group 19.5 (4.4) (p=0.127)<br>- Mean (SD) delayed recall in boxers 4.8 (1.9) in comparison group 6.8 (3.1) (p=0.282)<br>- Mean (SD) recognition in boxers 20.8 (0.8) in comparison group 21.0 (1.9) (p=0.832)                                                                                                                                                                                                                                                                                                             |
|                            | Rey-Osterrieth Complex Figure test: visuospatial memory                                                                          | Visuospatial memory                                                                                                                                        | - Mean (SD) Immediate recall in boxers 15.3 (3.4) in comparison group 18.4 (4.7) (p=0.291)<br>- Mean (SD) delayed recall in boxers 14.7 (3.3) in comparison group 20.6 (4.0) (p=0.045)<br>- Mean (SD) recognition in boxers 20.2 (1.8) in comparison group 20.3 (2.1) (p=0.97)                                                                                                                                                                                                                                                                                                            |
| Bernick et al. 2015 (26)   | CNS Vital Signs (including verbal memory, symbol digit coding, Stroop and a finger tapping test)                                 | Verbal memory                                                                                                                                              | - No difference detected                                                                                                                                                                                                                                                                                                                                                                                                                                                                                                                                                                  |
|                            |                                                                                                                                  | Processing speed                                                                                                                                           | - There was a significant relationship between the number of professional fights and speed of processing (p=0.041), with an estimated 0.19% reduction in processing speed per fight<br>- There was a significant relationship between the Fight Exposure score (FES) and speed of processing (p=0.023), with an estimated 2.1% reduction in processing speed scores for each increase in FES<br>- Processing speed was related to fighter type (adjusting for years of education) with both fighter groups scoring worse than controls, but boxers being overall slower than MMA fighters |
|                            |                                                                                                                                  | Psychomotor speed                                                                                                                                          | - Not clear                                                                                                                                                                                                                                                                                                                                                                                                                                                                                                                                                                               |
|                            |                                                                                                                                  | Reaction time                                                                                                                                              | - Not clear                                                                                                                                                                                                                                                                                                                                                                                                                                                                                                                                                                               |
